# Supplementary material
Source: publisher figshare collection journal article supplement (https://tandf.figshare.com/articles/dataset/_/7058048)
Supplement: Supplementary file 2 [file 1]

## Supplementary Information

Temporal changes in prey composition and biomass delivery to African Crowned Eagle nestlings in urban areas of KwaZulu-Natal, South Africa

Tim van der Meer, Shane McPherson and Colleen Downs

Ostrich 2018, 89(3): 241–250. <https://doi.org/10.2989/00306525.2018.1449027>

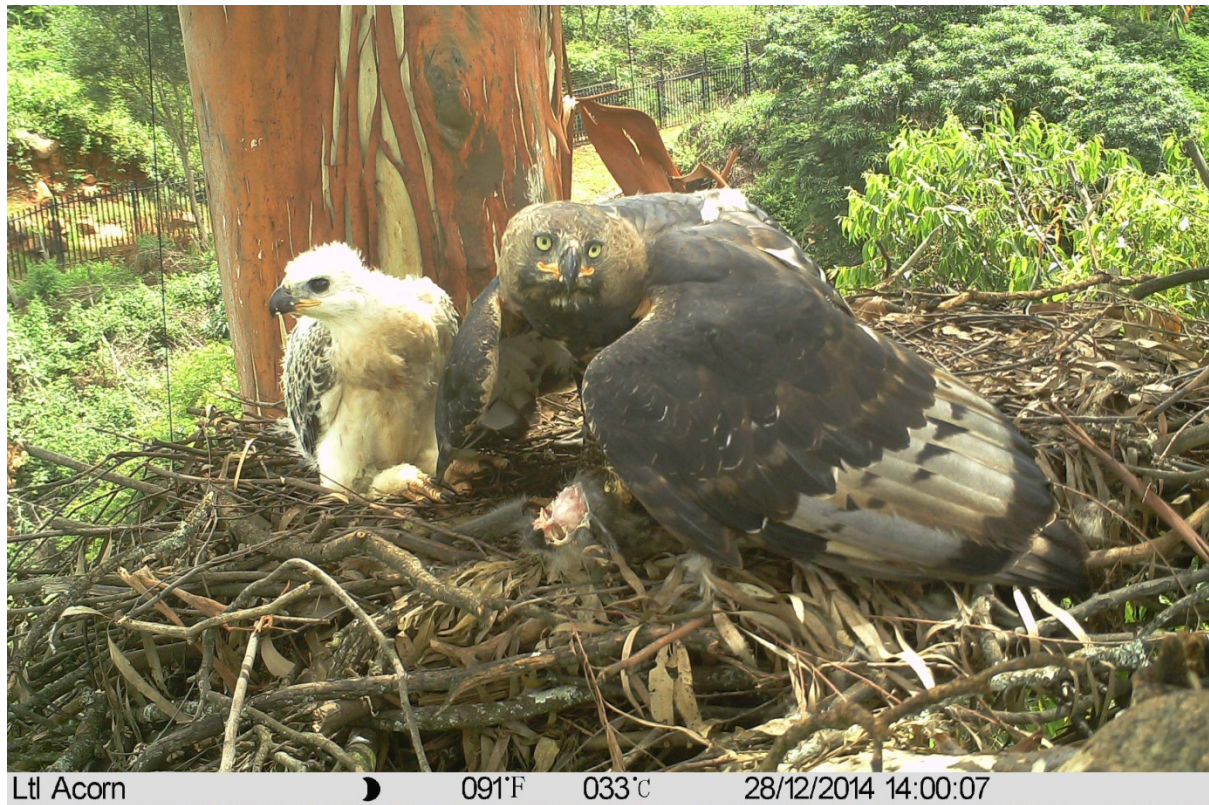

**Supplementary Figure S1:** Example of a nest camera-trap photograph of Crowned Eagle nest 5. Here the adult female and the nestling (aged 62 d) are feeding on an adult Vervet Monkey. Her posture of covering the prey may indicate that the adult male stayed near to the nest after delivering the prey. The females shield prey from their partner in the early nestling stages. As the nestling gets older it copies this behaviour when prey is delivered to the nest (SM pers. obs.).

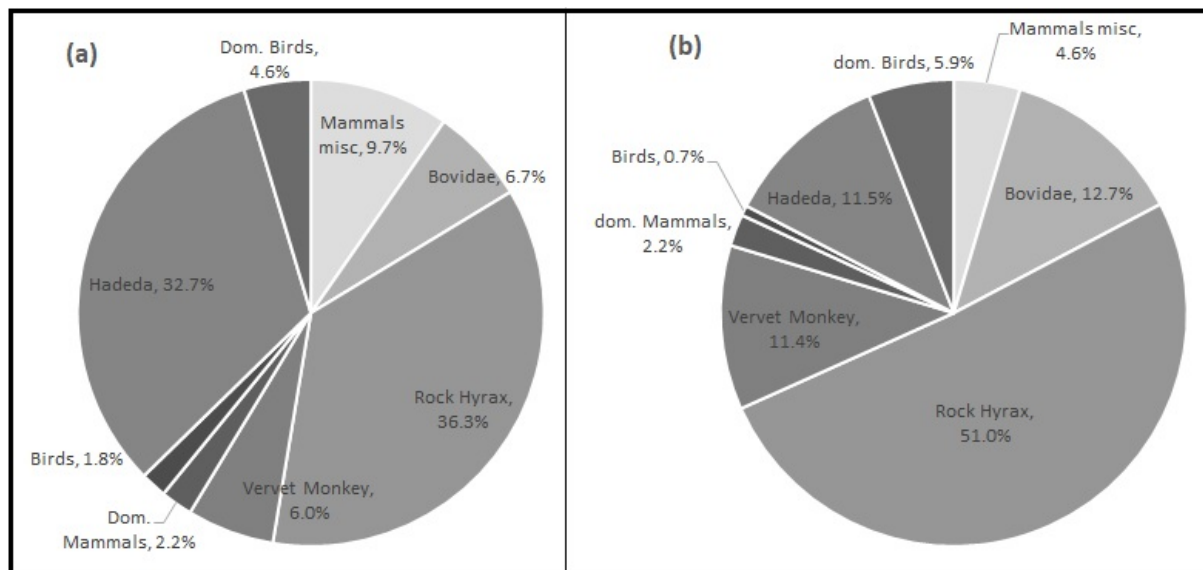

**Supplementary Figure S2:** Prey abundance in Crowned Eagle diet (a) and the estimated biomass share (b) for eight prey categories fed to Crowned Eagle nestlings in the current study.
